# Supplementary material
Source: HighWire-hosted journal article supplement (https://bmjopen.bmj.com/content/15/2/e092892)
Supplement: inline-supplementary-material-1 [file inline-supplementary-material-1.pdf]

Supplementary Table 1. Number of and content in physiotherapy treatments on day 3 after chest trauma divided in the cohorts from South Africa and Sweden. N (%).

|                                      |                     |          | Day 3                 |                 |         |
|--------------------------------------|---------------------|----------|-----------------------|-----------------|---------|
|                                      |                     |          | South Africa<br>n=123 | Sweden<br>n=136 | p-value |
| Receiving PT<br>treatment            | n (%)               |          | 86 (69.9)             | 95 (69.0)       | 0.991   |
|                                      | Sessions<br>per day | 1        | 0                     | 21 (31.8)       | <0.001  |
|                                      |                     | 2        | 80 (100.0)            | 41 (62.1)       |         |
|                                      |                     | 3        | 0                     | 4 (6.1)         |         |
|                                      |                     | Not reg. | 6                     | 29              |         |
| Receiving no<br>PT treatment         | n (%)               |          | 37 (30.1)             | 41 (31.0)       |         |
|                                      | <u>Reasons</u>      |          |                       |                 | 0.991   |
|                                      | Admitted            |          | 0                     | 0               |         |
|                                      | Surgery             |          | 1                     | 6               |         |
|                                      | X-ray               |          | 1                     | 0               |         |
|                                      | Unstable            |          | 0                     | 1               |         |
|                                      | Weekend             |          | 16                    | 16              |         |
|                                      | Compliant to care   |          | 5                     | 9               |         |
|                                      | Refused             |          | 1                     | 0               |         |
|                                      | No reason           |          | 13                    | 9               |         |
| Active Cycle of Breathing Technique  |                     |          | 35                    | 0               | <0.001  |
| Deep Breathing Exercises             |                     |          | 59                    | 9               | <0.001  |
| Cough                                |                     |          | 16                    | 4               | <0.010  |
| Breath Stacking                      |                     |          | 1                     | 0               | 1.000   |
| Manual Chest Physiotherapy           |                     |          | 2                     | 0               | 0.499   |
| Postural Drainage                    |                     |          | 0                     | 0               | n.a.    |
| Body positioning for V/Q matching    |                     |          | 1                     | 2               | 0.608   |
| Suction                              |                     |          | 1                     | 0               | 0.457   |
| Manual Hyperinflation                |                     |          | 0                     | 0               | n.a.    |
| Ventilator Hyper Inflation           |                     |          | 0                     | 0               | n.a.    |
| Incentive Spirometry                 |                     |          | 0                     | 9               | 0.004   |
| Mechanical Insufflation-Exsufflation |                     |          | 0                     | 0               | n.a.    |
| Positive Expiratory Pressure         |                     |          | 49                    | 69              | 0.147   |
| IPPB                                 |                     |          | 0                     | 0               | n.a.    |
| Inspiratory Muscle Training          |                     |          | 0                     | 0               | n.a.    |
| Shoulder ROM                         |                     |          | 19                    | 2               | <0.001  |

|                                  |                          |    |    |        |
|----------------------------------|--------------------------|----|----|--------|
| Trunk ROM                        |                          | 4  | 1  | 0.108  |
| Strength exercises               |                          | 0  | 1  | >0.999 |
| Exercises in bed                 |                          | 4  | 24 | <0.001 |
| Mobilisation at least to bedside |                          | 76 | 76 | 0.012  |
| Mobilisation to walking          |                          | 71 | 69 | 0.096  |
| Climbing stairs                  |                          | 8  | 0  | <0.001 |
| Cycling                          |                          | 47 | 0  | <0.001 |
| Any adverse event                |                          | 6  | 22 | <0.001 |
| Adverse events*                  | Saturation drop          | 1  | 0  |        |
|                                  | Disconnected attachments | 0  | 0  |        |
|                                  | ICD malfunction          | 1  | 1  |        |
|                                  | Falls                    | 0  | 0  |        |
|                                  | Dizziness                | 4  | 5  |        |
|                                  | Severe pain              | 0  | 16 |        |
